# Supplementary material for: Sex-Specific Isolation and Propagation of Human Premeiotic Fetal Germ Cells and Germ Cell-Like Cells
Source: MDPI journal article supplement (doi:10.3390/cells10051214), 2021-05-16
Supplement: s1 [file s1]

## Supplementary Information

# Sex-Specific Isolation and Propagation of Human Premeiotic Fetal Germ Cells and Germ Cell-Like Cells

Swati Mishra<sup>1</sup>, Jasin Taelman<sup>1</sup>, Yolanda W. Chang<sup>2</sup>, Annekatrien Boel<sup>1</sup>, Petra De Sutter<sup>1</sup>, Björn Heindryckx<sup>1,\*,+</sup> and Susana M. Chuva De Sousa Lopes<sup>1,2,\*,+</sup>

<sup>1</sup> Ghent-Fertility and Stem Cell Team (G-FaST), Department for Reproductive Medicine, Ghent University Hospital, 9000 Ghent, Belgium; swati.mishra@gmail.com (S.M.); J.Taelman@lumc.nl (J.T.); Annekatrien.Boel@UGent.be (A.B.); Petra.DeSutter@UGent.be (P.D.S.)

<sup>2</sup> Department of Anatomy and Embryology, Leiden University Medical Centre, 2333 ZC Leiden, The Netherlands; [W.I.Chang@lumc.nl](mailto:W.I.Chang@lumc.nl)

\* Correspondence: Bjorn.Heindryckx@ugent.be ([B.H.](mailto:B.H.)); lopes@lumc.nl ([S.M.C.D.S.L.](mailto:S.M.C.D.S.L.)); Tel.: +32-9332-4748 (B.H.); +31-71-526-9350 ([S.M.C.D.S.L.](mailto:S.M.C.D.S.L.))

† These two authors contributed equally to this manuscript.

List of Supplementary items:

- Figure S1
- Table S1
- Table S2



**Table S1. List of antibodies used for immunofluorescence and FACS.**

| Antibody                                           | Host Species       | Stock Concentration                              | Dilution used           | Company / Product No.     |
|----------------------------------------------------|--------------------|--------------------------------------------------|-------------------------|---------------------------|
| <b>Primary antibodies for immunofluorescence</b>   |                    |                                                  |                         |                           |
| POU5F1 (OCT3/4)                                    | mouse anti-human   | 0.2mg/ml                                         | 1:100                   | Santa Cruz / SC-5279      |
| SOX17                                              | goat anti-human    | 0.2mg/ml                                         | WM: 1:175<br>IHC: 1:200 | R&D Systems / AF1924      |
| PDPN                                               | rat anti-human     | 0.5mg/ml                                         | WM: 1:200<br>IHC: 1:500 | eBiosciences / 14-9381-80 |
| TNAP (ALPL)                                        | goat anti-mouse    | 0.2mg/ml                                         | 1:200                   | R&D system / AF2910       |
| DDX4                                               | rabbit anti-human  | 1mg/ml                                           | WM: 1:200<br>IHC: 1:500 | Abcam / Ab13840           |
| <b>Secondary antibodies for immunofluorescence</b> |                    |                                                  |                         |                           |
| Alexa 488                                          | donkey anti-goat   | 2mg/ml                                           | 1:500                   | Abcam / ab150129          |
| Alexa 594                                          | donkey anti-rat    | 2mg/ml                                           | 1:500                   | Invitrogen / A21209       |
| Alexa 647                                          | donkey anti-mouse  | 2mg/ml                                           | 1:500                   | Invitrogen / A31571       |
| Alexa 647                                          | donkey anti-rabbit | 2mg/ml                                           | 1:500                   | Invitrogen / A31573       |
| <b>Conjugated antibodies for FACS</b>              |                    |                                                  |                         |                           |
| BV421 conj. PDPN                                   | mouse anti-human   | 0.2mg/ml                                         | 1:100                   | BD Biosciences / 566456   |
| PE conj. PDPN                                      | rat anti-human     | 0.05mg/ml                                        | 1:3000                  | eBioscience / 12-9381-80  |
| Alexa 488 conj. TNAP                               | mouse anti-human   | 1ml in 100ml of staining volume (for 250K cells) | 1:100                   | BD Biosciences / 561495   |
| BV421 conj. ITGA6                                  | mouse anti-human   | 1ml in 100ml of staining volume (for 250K cells) | 1:100                   | BioLegend / 313624        |
| APC conj. EPCAM                                    | mouse anti-human   | 1ml in 100ml of staining volume (for 250K cells) | 1:100                   | BioLegend / 324207        |
| PE/Cyanine7 conj. EPCAM                            | mouse anti-human   | 1ml in 100ml of staining volume (for 250K cells) | 1:100                   | BioLegend / 324221        |
| BV421 conc. POU5F1                                 | mouse anti-human   | 0.2mg/ml                                         | 1:100                   | BD Biosciences / 565644   |

Table S2. List of differentially expressed genes between male mitotic and female mitotic FGCs.

|              | p_val      | ln avg fold change | pct.1 | pct.2 | p_val_adj  |
|--------------|------------|--------------------|-------|-------|------------|
| RPS4Y1       | 2.245E-146 | -5.815331595       | 0.033 | 0.997 | 4.524E-142 |
| EIF1AY       | 9.779E-149 | -5.031866128       | 0.007 | 0.997 | 1.97E-144  |
| DDX3Y        | 2.888E-148 | -4.992315905       | 0.005 | 0.994 | 5.819E-144 |
| TTY15        | 6.79E-117  | -3.73437114        | 0.005 | 0.843 | 1.368E-112 |
| TXLNGY       | 1.716E-116 | -3.601192326       | 0.007 | 0.843 | 3.458E-112 |
| KDM5D        | 4.374E-108 | -3.3932949         | 0.002 | 0.795 | 8.812E-104 |
| USP9Y        | 3.0382E-85 | -2.975198277       | 0     | 0.663 | 6.1211E-81 |
| GAGE1        | 2.486E-66  | -2.577180458       | 0.042 | 0.639 | 5.0084E-62 |
| APOA1        | 1.962E-72  | -2.390622397       | 0.044 | 0.663 | 3.9528E-68 |
| SNAR-C4      | 7.7607E-32 | -1.718893356       | 0.314 | 0.678 | 1.5635E-27 |
| SNAR-C3      | 1.049E-46  | -1.655379224       | 0.759 | 0.979 | 2.1134E-42 |
| EMX1         | 4.4218E-49 | -1.612674343       | 0.096 | 0.617 | 8.9085E-45 |
| HBG2         | 1.2471E-59 | -1.377466958       | 0.094 | 0.645 | 2.5125E-55 |
| PRTG         | 1.5742E-29 | -1.232335501       | 0.208 | 0.602 | 3.1715E-25 |
| ZADH2        | 2.4357E-38 | -1.167510598       | 0.183 | 0.672 | 4.9071E-34 |
| FBLN5        | 2.6929E-40 | -1.149191149       | 0.494 | 0.934 | 5.4254E-36 |
| S100A11      | 2.1599E-26 | -1.111847619       | 0.344 | 0.744 | 4.3516E-22 |
| LOC100996255 | 1.7205E-24 | -1.103450201       | 0.478 | 0.78  | 3.4664E-20 |
| KRCC1        | 6.5745E-38 | -1.086252179       | 0.19  | 0.684 | 1.3246E-33 |
| SLC35D2      | 1.9228E-27 | -1.074560572       | 0.398 | 0.786 | 3.874E-23  |
| SPRY4        | 5.1802E-27 | -1.027175727       | 0.419 | 0.792 | 1.0437E-22 |
| ENPP4        | 6.4306E-36 | -1.012812873       | 0.347 | 0.837 | 1.2956E-31 |
| KRT17P5      | 1.9894E-20 | -1.01015447        | 0.368 | 0.714 | 4.008E-16  |
| PRSS23       | 1.0446E-35 | -1.004520785       | 0.564 | 0.961 | 2.1045E-31 |
| B3GALNT1     | 5.0882E-28 | -1.001859857       | 0.237 | 0.651 | 1.0251E-23 |
| SYCE1        | 6.0571E-29 | -0.993202541       | 0.344 | 0.765 | 1.2203E-24 |
| PIP5K1B      | 1.6858E-37 | -0.974347924       | 0.478 | 0.937 | 3.3964E-33 |
| STOX1        | 1.6455E-22 | -0.968211627       | 0.255 | 0.617 | 3.3152E-18 |
| CD53         | 6.171E-31  | -0.9625812         | 0.279 | 0.738 | 1.2433E-26 |
| IDS          | 1.5236E-24 | -0.958967284       | 0.422 | 0.783 | 3.0696E-20 |
| ZNF560       | 2.7358E-26 | -0.950568717       | 0.225 | 0.627 | 5.5118E-22 |
| PPP1R14C     | 2.1546E-40 | -0.939439473       | 0.649 | 0.991 | 4.3409E-36 |
| FBLN2        | 2.1454E-20 | -0.937438214       | 0.363 | 0.705 | 4.3222E-16 |
| MSL1         | 2.1522E-21 | -0.934180643       | 0.333 | 0.69  | 4.336E-17  |
| ENTPD1       | 7.4728E-20 | -0.915827694       | 0.384 | 0.711 | 1.5055E-15 |
| PIGT         | 3.9939E-36 | -0.901035468       | 0.639 | 0.97  | 8.0464E-32 |
| SLC35B2      | 4.256E-36  | -0.875229251       | 0.698 | 0.955 | 8.5745E-32 |
| RNASE1       | 2.716E-22  | -0.860773915       | 0.494 | 0.837 | 5.472E-18  |
| LBH          | 1.0418E-21 | -0.846731505       | 0.513 | 0.834 | 2.0989E-17 |
| MROH8        | 3.2199E-23 | -0.84450453        | 0.237 | 0.62  | 6.4871E-19 |
| TEKT4P2      | 7.0669E-28 | -0.844208534       | 0.232 | 0.648 | 1.4238E-23 |
| LOC653786    | 2.0543E-17 | -0.840282822       | 0.302 | 0.611 | 4.1387E-13 |
| ZNF264       | 4.0733E-14 | -0.825770152       | 0.347 | 0.614 | 8.2064E-10 |
| H2AFY        | 2.0712E-20 | -0.814941568       | 0.461 | 0.798 | 4.1729E-16 |

|             |            |              |       |       |            |
|-------------|------------|--------------|-------|-------|------------|
| PEAK1       | 1.018E-19  | -0.812122919 | 0.295 | 0.645 | 2.051E-15  |
| DDX4        | 4.3716E-32 | -0.809024217 | 0.684 | 0.97  | 8.8076E-28 |
| C9orf156    | 2.7889E-17 | -0.804487435 | 0.382 | 0.696 | 5.6188E-13 |
| HACD4       | 1.7688E-19 | -0.794728412 | 0.281 | 0.636 | 3.5635E-15 |
| SNX27       | 6.5307E-29 | -0.778815375 | 0.836 | 0.973 | 1.3157E-24 |
| DCAF4L1     | 1.2182E-21 | -0.776590454 | 0.689 | 0.952 | 2.4543E-17 |
| MLLT3       | 4.0909E-21 | -0.775763195 | 0.253 | 0.608 | 8.2419E-17 |
| CTSH        | 6.8461E-22 | -0.771850354 | 0.438 | 0.786 | 1.3793E-17 |
| SGSM2       | 8.0206E-18 | -0.766648405 | 0.375 | 0.723 | 1.6159E-13 |
| ANKRD20A12P | 1.6652E-14 | -0.75809797  | 0.44  | 0.699 | 3.3548E-10 |
| LINC00467   | 2.3077E-28 | -0.75584772  | 0.651 | 0.955 | 4.6492E-24 |
| DAZL        | 3.6891E-38 | -0.755059147 | 0.81  | 0.997 | 7.4325E-34 |
| MARCH8*     | 5.4784E-26 | -0.749775179 | 0.649 | 0.925 | 1.1037E-21 |
| SERPING1    | 1.4649E-28 | -0.749279779 | 0.918 | 0.994 | 2.9514E-24 |
| PER3        | 1.5315E-23 | -0.747973104 | 0.283 | 0.666 | 3.0856E-19 |
| TJP3        | 6.9908E-23 | -0.744473926 | 0.637 | 0.892 | 1.4084E-18 |
| STK39       | 1.1814E-18 | -0.743047536 | 0.532 | 0.892 | 2.3801E-14 |
| RAB6B       | 1.1106E-19 | -0.74270123  | 0.333 | 0.69  | 2.2375E-15 |
| ZNF473      | 2.4975E-21 | -0.742492915 | 0.532 | 0.855 | 5.0318E-17 |
| HDAC9       | 2.657E-24  | -0.741574136 | 0.548 | 0.898 | 5.3531E-20 |
| PTCH1       | 2.1952E-22 | -0.740849297 | 0.267 | 0.657 | 4.4227E-18 |
| ICA1        | 3.4635E-27 | -0.739654736 | 0.33  | 0.783 | 6.978E-23  |
| LMBR1L      | 1.8688E-23 | -0.734934697 | 0.398 | 0.819 | 3.765E-19  |
| LINC00339   | 5.3781E-19 | -0.733037619 | 0.279 | 0.627 | 1.0835E-14 |
| COL22A1     | 1.5608E-13 | -0.732414689 | 0.525 | 0.765 | 3.1445E-09 |
| AGGF1       | 5.6422E-30 | -0.731540303 | 0.693 | 0.964 | 1.1367E-25 |
| STK31       | 5.2834E-15 | -0.728976875 | 0.436 | 0.723 | 1.0645E-10 |
| TDRD9       | 1.0273E-23 | -0.716849627 | 0.393 | 0.771 | 2.0697E-19 |
| SKAP2       | 6.3066E-27 | -0.715284023 | 0.621 | 0.922 | 1.2706E-22 |
| NR1H2       | 6.8461E-24 | -0.707402344 | 0.719 | 0.952 | 1.3793E-19 |
| RAB11B      | 3.0624E-20 | -0.705575752 | 0.604 | 0.877 | 6.1699E-16 |
| CDH2        | 1.4899E-26 | -0.70375383  | 0.775 | 0.979 | 3.0017E-22 |
| RHOG        | 1.5037E-21 | -0.700048529 | 0.4   | 0.786 | 3.0296E-17 |
| C2orf74     | 8.9902E-25 | -0.699532446 | 0.646 | 0.925 | 1.8113E-20 |
| PRR15       | 7.7557E-14 | -0.69907575  | 0.344 | 0.614 | 1.5625E-09 |
| RPRM        | 2.4825E-22 | -0.698793285 | 0.527 | 0.873 | 5.0016E-18 |
| ZNF16       | 1.6854E-16 | -0.696337515 | 0.335 | 0.645 | 3.3957E-12 |
| ZNF879      | 7.6354E-17 | -0.695976082 | 0.326 | 0.648 | 1.5383E-12 |
| SETD9       | 5.9144E-18 | -0.694565159 | 0.319 | 0.66  | 1.1916E-13 |
| SYAP1       | 1.0356E-25 | 0.696128406  | 0.934 | 0.916 | 2.0864E-21 |
| NKAP        | 1.1532E-19 | 0.698613682  | 0.888 | 0.822 | 2.3233E-15 |
| CETN2       | 1.2207E-45 | 0.698858231  | 0.995 | 0.991 | 2.4593E-41 |
| LGALS1      | 1.357E-21  | 0.708947692  | 0.991 | 0.985 | 2.734E-17  |
| FHL2        | 5.686E-10  | 0.715162506  | 0.724 | 0.605 | 1.1455E-05 |
| UPF3B       | 2.5064E-31 | 0.719652309  | 0.948 | 0.94  | 5.0497E-27 |
| DPPA5       | 5.8083E-12 | 0.719977419  | 0.925 | 0.937 | 1.1702E-07 |

|          |            |             |       |       |            |
|----------|------------|-------------|-------|-------|------------|
| CLDN7    | 1.3322E-08 | 0.726268983 | 0.649 | 0.524 | 0.0002684  |
| THOC2    | 6.8972E-44 | 0.740649866 | 1     | 0.958 | 1.3896E-39 |
| TSR2     | 1.1666E-32 | 0.741558609 | 0.979 | 0.976 | 2.3503E-28 |
| CYB5A    | 9.2881E-19 | 0.746803755 | 0.916 | 0.861 | 1.8713E-14 |
| TMSB4X   | 1.4802E-55 | 0.747375538 | 1     | 1     | 2.9822E-51 |
| PPP1R15A | 5.7929E-22 | 0.750559833 | 0.911 | 0.825 | 1.1671E-17 |
| PYGL     | 8.0558E-09 | 0.756942769 | 0.726 | 0.675 | 0.0001623  |
| OGT      | 1.0798E-26 | 0.757069373 | 0.965 | 0.931 | 2.1754E-22 |
| GSPT2    | 3.7759E-08 | 0.7613267   | 0.637 | 0.539 | 0.00076073 |
| PLIN2    | 1.1036E-23 | 0.76935916  | 0.925 | 0.825 | 2.2235E-19 |
| PCSK1N   | 2.5619E-18 | 0.772128697 | 0.984 | 0.994 | 5.1614E-14 |
| ATRX     | 4.2127E-37 | 0.776073115 | 0.991 | 0.967 | 8.4874E-33 |
| SLC25A5  | 1.7795E-57 | 0.777908651 | 1     | 1     | 3.5851E-53 |
| RNF113A  | 3.3715E-14 | 0.790091395 | 0.735 | 0.578 | 6.7926E-10 |
| QTRT1    | 3.0617E-15 | 0.791055784 | 0.803 | 0.741 | 6.1684E-11 |
| ATP11C   | 5.8543E-45 | 0.79455939  | 0.986 | 0.985 | 1.1795E-40 |
| NMT2     | 3.5803E-13 | 0.7985535   | 0.785 | 0.645 | 7.2132E-09 |
| ATP5G1   | 6.4042E-45 | 0.805022199 | 0.993 | 0.982 | 1.2903E-40 |
| PDHA1    | 5.6829E-20 | 0.818387702 | 0.862 | 0.69  | 1.1449E-15 |
| TCEAL4   | 2.9675E-20 | 0.829049098 | 0.885 | 0.795 | 5.9787E-16 |
| EIF1AX   | 1.7764E-83 | 0.83421497  | 0.998 | 1     | 3.5789E-79 |
| DBI      | 4.1487E-24 | 0.84088565  | 0.937 | 0.904 | 8.3583E-20 |
| DMD      | 6.5097E-55 | 0.844933547 | 0.988 | 0.973 | 1.3115E-50 |
| PHPT1    | 4.1446E-51 | 0.848538631 | 0.995 | 0.988 | 8.3502E-47 |
| ALPPL2   | 3.904E-11  | 0.8531822   | 0.71  | 0.566 | 7.8654E-07 |
| FAM60A   | 4.9018E-40 | 0.857126872 | 0.967 | 0.955 | 9.8757E-36 |
| PRPS1    | 8.0598E-17 | 0.860180539 | 0.827 | 0.726 | 1.6238E-12 |
| NUSAP1   | 1.5623E-15 | 0.862297448 | 0.965 | 0.919 | 3.1476E-11 |
| LPCAT4   | 1.0852E-07 | 0.863853915 | 0.618 | 0.5   | 0.00218628 |
| SLC2A1   | 1.5067E-12 | 0.879870181 | 0.721 | 0.566 | 3.0356E-08 |
| CRYM     | 5.7288E-10 | 0.880329163 | 0.625 | 0.458 | 1.1542E-05 |
| IFITM1   | 1.2316E-35 | 0.884027673 | 0.993 | 0.994 | 2.4812E-31 |
| DIAPH2   | 7.7274E-28 | 0.908010669 | 0.904 | 0.774 | 1.5568E-23 |
| HMGB3    | 1.1329E-56 | 0.909929067 | 0.995 | 1     | 2.2824E-52 |
| HSD17B10 | 1.3383E-74 | 0.915124575 | 0.993 | 1     | 2.6962E-70 |
| PI4KAP2  | 2.3698E-12 | 0.915855296 | 0.71  | 0.566 | 4.7744E-08 |
| REC8     | 9.3001E-24 | 0.916568833 | 0.855 | 0.672 | 1.8737E-19 |
| NDUFA1   | 1.3151E-90 | 0.920445929 | 1     | 1     | 2.6495E-86 |
| APOC1P1  | 2.9874E-13 | 0.932229235 | 0.611 | 0.364 | 6.0188E-09 |
| IDH3G    | 5.0253E-24 | 0.935794377 | 0.845 | 0.714 | 1.0124E-19 |
| ATP6AP2  | 7.8391E-62 | 0.938017704 | 0.998 | 0.991 | 1.5794E-57 |
| PRKX     | 7.7501E-16 | 0.940454002 | 0.609 | 0.343 | 1.5614E-11 |
| ACTG2    | 6.2774E-25 | 0.948798301 | 0.951 | 0.864 | 1.2647E-20 |
| BNIP3    | 2.5315E-40 | 0.950246556 | 0.998 | 0.997 | 5.1001E-36 |
| STAG2    | 3.4495E-30 | 0.952531627 | 0.92  | 0.816 | 6.9498E-26 |
| FKBP11   | 3.8911E-16 | 0.953011951 | 0.749 | 0.645 | 7.8394E-12 |

|           |            |             |       |       |            |
|-----------|------------|-------------|-------|-------|------------|
| MDK       | 3.6426E-57 | 0.953998575 | 1     | 0.997 | 7.3388E-53 |
| PIN4      | 1.7194E-74 | 0.97341047  | 0.991 | 0.994 | 3.4642E-70 |
| RHOBTB3   | 2.9358E-11 | 0.977806015 | 0.616 | 0.431 | 5.9148E-07 |
| SAT1      | 1.1857E-61 | 1.000273302 | 1     | 1     | 2.3887E-57 |
| COL1A2    | 1.3021E-15 | 1.011314823 | 0.639 | 0.467 | 2.6234E-11 |
| COX7B     | 1.3563E-64 | 1.012192301 | 0.993 | 0.988 | 2.7325E-60 |
| BRDT      | 2.0261E-36 | 1.02425211  | 0.92  | 0.744 | 4.0819E-32 |
| PGK1      | 8.3864E-76 | 1.030532987 | 0.998 | 1     | 1.6896E-71 |
| NLRP7     | 2.6231E-30 | 1.039416876 | 0.93  | 0.828 | 5.2848E-26 |
| CRIP1     | 8.8147E-55 | 1.048008315 | 0.988 | 0.946 | 1.7759E-50 |
| DEPTOR    | 1.996E-15  | 1.05139215  | 0.637 | 0.434 | 4.0214E-11 |
| ELF3      | 1.3192E-19 | 1.075156533 | 0.674 | 0.395 | 2.6578E-15 |
| HSPB1     | 1.7833E-08 | 1.085057722 | 0.979 | 0.973 | 0.00035929 |
| EIF2S3    | 3.4857E-65 | 1.095885869 | 0.998 | 0.979 | 7.0226E-61 |
| LAS1L     | 8.0952E-64 | 1.111708673 | 0.977 | 0.922 | 1.6309E-59 |
| LDHA      | 4.0217E-58 | 1.219874914 | 1     | 0.997 | 8.1026E-54 |
| MEG3      | 3.4804E-66 | 1.239552588 | 0.998 | 0.997 | 7.0121E-62 |
| SLC35F2   | 1.1048E-23 | 1.249868091 | 0.689 | 0.395 | 2.2259E-19 |
| PRDX2     | 1.143E-46  | 1.25055862  | 0.934 | 0.798 | 2.3028E-42 |
| GDPD2     | 3.9745E-24 | 1.281205743 | 0.785 | 0.56  | 8.0074E-20 |
| ID1       | 2.8218E-30 | 1.403248743 | 0.878 | 0.846 | 5.6851E-26 |
| ARRDC3    | 1.1065E-21 | 1.463934874 | 0.719 | 0.527 | 2.2292E-17 |
| NGFRAP1   | 1.1167E-27 | 1.481777737 | 0.834 | 0.714 | 2.2498E-23 |
| TUBB2B    | 4.731E-31  | 1.65301173  | 0.707 | 0.377 | 9.5316E-27 |
| ANXA2     | 1.1838E-63 | 1.768904759 | 0.934 | 0.617 | 2.385E-59  |
| PTN       | 1.159E-36  | 1.8157341   | 0.66  | 0.253 | 2.335E-32  |
| CA2       | 1.13E-33   | 1.845621888 | 0.696 | 0.349 | 2.2766E-29 |
| LINC01356 | 9.7734E-37 | 2.587518332 | 0.696 | 0.331 | 1.969E-32  |
